# Supplementary material for: refineD: improved protein structure refinement using machine learning based restrained relaxation
Source: Oxford University Press journal article supplement (doi:10.1093/bioinformatics/btz101), 2019-02-13
Supplement: bioinformatics_35_18_3320_s9.pdf [file bioinformatics_35_18_3320_s9.pdf]

# Supplementary Information

*for*

refined: Improved protein structure refinement using machine learning  
based restrained relaxation

Debswapna Bhattacharya<sup>1, \*</sup>

<sup>1</sup>Department of Computer Science and Software Engineering, Auburn University, Auburn, AL  
36849, USA

\*To whom correspondence should be addressed. Phone: (334)-844-6321. Fax: (334)-844-6329.  
E-mail: [bhattacharyad@auburn.edu](mailto:bhattacharyad@auburn.edu).

| <b>Supplementary Item</b> | <b>Title</b>                                                                                                                                                     |
|---------------------------|------------------------------------------------------------------------------------------------------------------------------------------------------------------|
| Supplementary Table S1    | Effects of multi-resolution probabilistic restraints.                                                                                                            |
| Supplementary Table S2    | Refinement performance considering GDT-HA of the first selected refined structure.                                                                               |
| Supplementary Table S3    | Refinement performance considering GDT-HA of the best of top five refined structures.                                                                            |
| Supplementary Figure S1   | $\Delta$ GDT-HA of refinedD with cumulative and non-cumulative restraints with SCOP family, superfamily, fold class similarity for any of the training proteins. |

Supplementary Table S1. Effects of multi-resolution probabilistic restraints.

| PDB   | Starting<br>GDT-HA | Refined GDT-HA  |                 |                 |                 |
|-------|--------------------|-----------------|-----------------|-----------------|-----------------|
|       |                    | 0.5Å restraints | 1.0Å restraints | 2.0Å restraints | 4.0Å restraints |
| 1a07A | 74.05              | 73.10           | 73.57           | 72.38           | 74.52           |
| 1a07A | 74.05              | 73.10           | 73.57           | 72.38           | 74.52           |
| 1a00A | 64.18              | 63.48           | 64.72           | 55.5            | 53.01           |
| 101m_ | 66.56              | 69.81           | 67.53           | 65.75           | 59.25           |
| 1a5v_ | 55.82              | 57.36           | 57.02           | 51.03           | 52.57           |
| 1atlA | 64                 | 67.37           | 64.75           | 63.88           | 64.38           |
| 1afqC | 55.73              | 56.51           | 52.34           | 48.7            | 47.4            |
| 1awqA | 57.32              | 57.32           | 56.4            | 55.18           | 56.55           |
| 1b0b_ | 62.94              | 62.59           | 59.4            | 51.77           | 55.67           |
| 1b11A | 54.2               | 52.65           | 47.79           | 46.68           | 45.58           |
| 1b66A | 57.07              | 55.62           | 55.07           | 53.44           | 51.45           |
| 1b1cA | 66.27              | 65.51           | 69.28           | 67.02           | 60.09           |
| 1bs4A | 59.23              | 60.12           | 57.89           | 57.44           | 54.91           |
| 1bh5A | 53.1               | 50.16           | 49.02           | 44.61           | 40.36           |
| 1be9A | 58.56              | 59.26           | 53.94           | 52.08           | 45.6            |
| 1bzsA | 41.52              | 40.30           | 40.61           | 39.39           | 41.52           |
| 1bvqA | 59.53              | 61.33           | 60.43           | 57.19           | 59.71           |
| 1c9kB | 20.56              | 20.28           | 20              | 21.11           | 21.39           |
| 1cfvH | 63.66              | 62.39           | 58.82           | 55.04           | 60.08           |
| 1ccwA | 60.04              | 60.04           | 60.04           | 57.85           | 57.48           |
| 1cv8_ | 36.13              | 36.42           | 36.13           | 32.66           | 32.51           |
| 1cpq_ | 66.47              | 67.83           | 67.25           | 60.66           | 57.36           |
| 1d0iA | 38.83              | 39.17           | 37.17           | 38.5            | 34.67           |
| 1d01D | 56.85              | 56.10           | 52.08           | 52.68           | 47.32           |
| 1d2uA | 32.61              | 31.79           | 30.16           | 30.16           | 29.35           |
| 1d1jC | 53.28              | 56.93           | 52.37           | 51.64           | 50.18           |
| 1d8uA | 48.48              | 49.55           | 47.73           | 44.39           | 38.79           |
| 1d7bA | 10.41              | 10.14           | 9.73            | 10.14           | 10.14           |
| 1df8A | 62.29              | 62.08           | 58.69           | 53.39           | 56.78           |
| 1ddrA | 63.68              | 62.89           | 61.01           | 58.65           | 51.73           |
| 1dt1A | 32.75              | 31.78           | 31.78           | 31.2            | 28.1            |
| 1ds7A | 51.41              | 51.79           | 52.82           | 48.97           | 45.51           |
| 1dveA | 43.93              | 43.93           | 43.22           | 40.65           | 39.84           |
| 1dud_ | 59.07              | 60.08           | 57.46           | 51.81           | 49.6            |
| 1dypA | 25.86              | 25.86           | 23.86           | 23.14           | 22.43           |
| 1dw0A | 32.81              | 31.47           | 32.14           | 32.37           | 25              |
| 1dza  | 45.22              | 46.58           | 48.09           | 50.96           | 49.59           |
| 1e29A | 42.22              | 41.30           | 40.19           | 35.37           | 35.19           |
| 1e20A | 51.76              | 51.49           | 49.73           | 49.46           | 48.24           |
| 1ejbA | 65.33              | 67.26           | 67.56           | 65.63           | 63.84           |

|       |       |       |       |       |       |
|-------|-------|-------|-------|-------|-------|
| le6iA | 72.05 | 72.95 | 71.14 | 69.09 | 66.59 |
| lelrA | 60.74 | 62.70 | 64.65 | 66.99 | 61.13 |
| lelkA | 58.99 | 60.29 | 58.17 | 54.58 | 57.68 |
| lelwA | 68.59 | 72.65 | 76.07 | 80.13 | 85.47 |
| leumA | 75.31 | 72.52 | 74.07 | 72.52 | 66.93 |
| leqmA | 57.28 | 57.59 | 57.75 | 55.38 | 47.31 |
| lf7lA | 51.27 | 54.03 | 56.57 | 53.81 | 56.36 |
| leyhA | 54.34 | 55.56 | 53.13 | 51.91 | 56.42 |
| lew4A | 59.43 | 61.32 | 63.44 | 65.57 | 65.57 |
| lff3A | 52.62 | 49.29 | 47.14 | 46.79 | 45.36 |
| lfdk_ | 25.81 | 24.39 | 22.97 | 21.34 | 23.98 |
| lg5tA | 42.04 | 41.88 | 41.4  | 41.4  | 41.56 |
| lfm0D | 70.67 | 71.33 | 70.33 | 61.67 | 64.33 |
| lgoyA | 36.57 | 34.03 | 32.41 | 30.09 | 27.55 |
| lgcvB | 60.85 | 62.32 | 59.19 | 53.68 | 51.65 |
| lgy7A | 63.84 | 64.67 | 62.6  | 61.57 | 57.64 |
| lgxuA | 58.81 | 60.80 | 59.09 | 55.68 | 52.56 |
| lgpqA | 45.28 | 45.08 | 44.88 | 44.09 | 49.61 |
| lh97A | 54.08 | 53.40 | 54.42 | 52.72 | 56.29 |
| lh4hA | 47.82 | 46.72 | 46.48 | 44.17 | 38.96 |
| lhb_  | 59.86 | 61.56 | 57.65 | 58.84 | 55.78 |
| lhlb_ | 50.16 | 50.32 | 50    | 52.55 | 43.95 |
| lhdoA | 56.71 | 58.54 | 60    | 62.07 | 61.59 |
| lj3wA | 59.51 | 63.25 | 60.26 | 59.51 | 57.65 |
| li4sA | 44.9  | 44.39 | 41.84 | 43.88 | 44.05 |
| lhn_  | 28.65 | 28.46 | 29.04 | 26.92 | 30.96 |
| lkafA | 24.77 | 24.07 | 22.92 | 22.69 | 21.53 |
| lj77A | 43.97 | 45.73 | 46.11 | 44.47 | 39.82 |
| lmn8A | 24.74 | 26.05 | 25.53 | 25    | 27.37 |
| lmk0A | 44.59 | 45.10 | 44.33 | 43.56 | 37.89 |
| l19lA | 59.8  | 59.12 | 58.11 | 63.85 | 49.32 |
| lnlqA | 23.1  | 22.86 | 25.24 | 24.05 | 20.24 |
| loh0A | 62.8  | 66.00 | 65.6  | 65.8  | 62.2  |
| lo82A | 30.36 | 30.36 | 30    | 33.21 | 25    |
| lnwaA | 24.11 | 24.70 | 24.55 | 24.7  | 25.15 |
| lou8A | 41.51 | 42.45 | 43.87 | 43.63 | 46.7  |
| loohA | 48.21 | 50.00 | 50.79 | 49.6  | 49.8  |
| lok0A | 18.24 | 16.55 | 17.23 | 16.89 | 15.54 |
| low4A | 54.79 | 55.21 | 54.79 | 51.04 | 48.33 |
| lq4kA | 7.88  | 8.45  | 8.56  | 7.55  | 8.56  |
| lq1fA | 62.5  | 65.71 | 63.18 | 61.82 | 55.91 |
| lrfyA | 61.8  | 61.80 | 64.04 | 59.83 | 57.58 |
| lsz7A | 46.86 | 48.11 | 46.23 | 44.97 | 44.03 |

|       |       |       |       |       |       |
|-------|-------|-------|-------|-------|-------|
| 1t3yA | 62.21 | 64.89 | 64.5  | 61.26 | 54.58 |
| 1t1vA | 61.56 | 60.48 | 57.53 | 48.92 | 53.76 |
| 1tkuA | 9.44  | 9.95  | 9.31  | 9.31  | 9.95  |
| 1t7dA | 4.81  | 4.93  | 5.17  | 5.05  | 4.93  |
| 1tqgA | 72.14 | 72.14 | 72.62 | 67.86 | 63.33 |
| 1tp6A | 42.06 | 42.46 | 45.63 | 41.67 | 40.67 |
| 1tugB | 41.18 | 40.52 | 39.87 | 39.54 | 37.58 |
| 1u2hA | 80.21 | 85.42 | 79.43 | 76.3  | 69.27 |
| 1tzvA | 51.77 | 51.06 | 53.19 | 53.9  | 48.4  |
| 1ufyA | 34.17 | 35.09 | 34.86 | 33.72 | 33.49 |
| 1u84A | 33.64 | 34.57 | 31.79 | 30.25 | 31.79 |
| 1u55A | 48.46 | 48.18 | 45.25 | 49.44 | 43.44 |
| 1ugiA | 16.87 | 16.57 | 16.27 | 14.76 | 15.96 |
| 1usqA | 32.91 | 33.45 | 33.63 | 32.73 | 29.68 |
| 1w53A | 50.3  | 48.51 | 45.54 | 44.05 | 45.83 |
| 1uxzA | 61.45 | 60.11 | 58.21 | 55.53 | 52.86 |
| 1uuyA | 64.91 | 68.01 | 69.57 | 69.72 | 66.15 |
| 1wlzA | 36.18 | 36.47 | 36.47 | 36.18 | 35    |
| 1wmhB | 59.45 | 60.67 | 60.98 | 57.62 | 66.77 |
| 1wmhA | 72.89 | 74.40 | 73.49 | 64.46 | 66.87 |
| 1wzdA | 46.41 | 47.13 | 47.61 | 44.26 | 44.86 |
| 1wpaA | 24.77 | 23.36 | 23.36 | 24.07 | 22.66 |
| 1x91A | 72.32 | 72.82 | 71.14 | 66.61 | 68.96 |
| 1x6iA | 53.37 | 55.62 | 62.36 | 64.89 | 69.1  |
| 1xa8A | 22.96 | 23.60 | 24.74 | 25    | 23.09 |
| 1xmtA | 55.79 | 55.53 | 56.84 | 55    | 51.32 |
| 1y3dl | 39.06 | 38.67 | 41.02 | 37.89 | 38.67 |
| 1xppA | 62.37 | 64.39 | 63.13 | 54.8  | 52.02 |
| 1yd0A | 44.94 | 44.66 | 44.94 | 47.19 | 42.98 |
| 1y9tA | 20.23 | 19.32 | 19.32 | 19.32 | 18.18 |
| 1z3eB | 66.07 | 68.30 | 70.54 | 66.96 | 64.73 |
| 2bwfA | 64.61 | 65.58 | 64.29 | 58.12 | 54.22 |
| 2b5aA | 77.6  | 79.22 | 70.78 | 68.83 | 71.1  |
| 2chhA | 17.26 | 16.81 | 15.71 | 16.37 | 14.82 |
| 2cb8A | 76.74 | 77.03 | 77.03 | 78.78 | 72.38 |
| 2e92A | 63.78 | 66.84 | 68.2  | 67.52 | 69.05 |
| 2ev1A | 17.97 | 20.14 | 18.38 | 18.65 | 17.7  |
| 2gkgA | 70.49 | 71.52 | 66.19 | 64.55 | 66.39 |
| 2fcwA | 46.46 | 47.64 | 45.05 | 45.05 | 45.05 |
| 2h7zA | 53    | 57.33 | 53    | 52.33 | 53    |
| 2grrB | 21.02 | 21.82 | 21.34 | 21.02 | 23.57 |
| 2hi0A | 51.05 | 50.52 | 51.22 | 45.63 | 48.78 |
| 2ifrA | 11.76 | 12.13 | 12.62 | 11.52 | 11.03 |

|             |                |                    |                |                |                    |
|-------------|----------------|--------------------|----------------|----------------|--------------------|
| 2iu5A       | 28.91          | 29.19              | 27.65          | 30.45          | 29.75              |
| 2ip6A       | 73.28          | 76.15              | 79.02          | 75.29          | 78.16              |
| 2j8wA       | 55.47          | 56.05              | 58.2           | 56.05          | 59.77              |
| 2nmlA       | 20.5           | 19.75              | 20             | 19.25          | 22                 |
| 2jekA       | 14.11          | 14.11              | 14.11          | 14.29          | 13.21              |
| 2o37A       | 55.56          | 58.64              | 58.64          | 67.59          | 60.19              |
| 2ofcA       | 22.34          | 22.16              | 21.63          | 18.09          | 19.15              |
| 2pmrA       | 72.7           | 69.41              | 65.13          | 66.12          | 69.74              |
| 2p6wA       | 21.24          | 21.24              | 21.6           | 22.57          | 21                 |
| 2oznA       | 39.85          | 40.41              | 40.6           | 38.35          | 35.9               |
| 2pvbA       | 40.42          | 40.42              | 39.95          | 43.22          | 37.62              |
| 2pv2A       | 68.2           | 68.93              | 72.57          | 72.09          | 71.12              |
| 2rb8A       | 79.57          | 80.91              | 80.91          | 77.96          | 73.66              |
| 2v2pA       | 80             | 78.53              | 74.12          | 69.41          | 68.09              |
| 2rk3A       | 59.63          | 62.30              | 64.44          | 63.24          | 64.44              |
| 2zs0D       | 67.93          | 68.97              | 65.86          | 65.52          | 58.62              |
| 2vyyA       | 47.27          | 46.14              | 47.05          | 43.41          | 45.45              |
| 2v33A       | 19.78          | 21.70              | 23.9           | 24.18          | 21.98              |
| 3bqpA       | 59.69          | 61.87              | 63.75          | 55.94          | 57.5               |
| 3bfoA       | 71.18          | 70.88              | 73.24          | 74.41          | 70.88              |
| 3by4A       | 39.39          | 40.99              | 44.19          | 40.84          | 38.95              |
| 3bqsA       | 28.24          | 28.53              | 27.35          | 26.18          | 26.18              |
| 3c7mA       | 45.26          | 45.13              | 45.64          | 47.31          | 43.08              |
| 3d9nA       | 55.43          | 59.60              | 58.88          | 67.21          | 57.25              |
| 3cjsB       | 57.29          | 59.38              | 59.38          | 67.01          | 61.46              |
| <b>Mean</b> | <b>48.9988</b> | <b>49.54133333</b> | <b>48.9566</b> | <b>47.6046</b> | <b>46.25806667</b> |

Supplementary Table S2. Refinement performance considering GDT-HA of the first selected refined structure.

| PDB   | Starting<br>GDT-HA | Refined GDT-HA |            |       |           |               |               |               |               |              |                |
|-------|--------------------|----------------|------------|-------|-----------|---------------|---------------|---------------|---------------|--------------|----------------|
|       |                    | refined-C      | refined-NC | FG-MD | FastRelax | FastRelax-0.5 | FastRelax-1.0 | FastRelax-2.0 | FastRelax-4.0 | ModRefiner-0 | ModRefiner-100 |
| 1a07A | 74.05              | 76.19          | 73.81      | 77.38 | 69.29     | 74.05         | 73.1          | 68.1          | 73.33         | 71.19        | 73.57          |
| 1a00A | 64.18              | 65.07          | 52.13      | 64.18 | 50.89     | 63.48         | 60.82         | 59.93         | 54.43         | 62.77        | 64.36          |
| 101m_ | 66.56              | 69.64          | 61.53      | 69.32 | 51.14     | 68.99         | 65.58         | 66.4          | 60.39         | 68.67        | 67.86          |
| 1a5v_ | 55.82              | 57.19          | 49.83      | 54.62 | 45.55     | 56.51         | 55.65         | 50.17         | 50.86         | 55.48        | 56.51          |
| 1atlA | 64                 | 67.5           | 64.13      | 64.38 | 60.87     | 66.75         | 63.88         | 66.5          | 63.5          | 63.88        | 64.13          |
| 1afqC | 55.73              | 56.25          | 46.88      | 55.73 | 38.28     | 55.99         | 54.17         | 50            | 47.4          | 44.79        | 56.25          |
| 1awqA | 57.32              | 57.32          | 58.23      | 56.86 | 57.32     | 57.47         | 58.23         | 57.77         | 53.96         | 57.77        | 57.47          |
| 1b0b_ | 62.94              | 62.41          | 61.35      | 63.12 | 57.09     | 62.06         | 59.57         | 52.48         | 47.16         | 59.93        | 63.48          |
| 1b11A | 54.2               | 52.43          | 51.11      | 52.88 | 42.92     | 51.55         | 50.44         | 48.45         | 47.12         | 50.22        | 52.88          |
| 1b66A | 57.07              | 58.51          | 50.36      | 57.97 | 56.7      | 56.7          | 55.07         | 53.08         | 53.62         | 56.16        | 57.07          |
| 1b1cA | 66.27              | 67.77          | 66.72      | 64.31 | 54.07     | 66.57         | 66.42         | 60.54         | 59.79         | 66.57        | 66.87          |
| 1bs4A | 59.23              | 60.57          | 56.85      | 59.08 | 55.36     | 59.67         | 59.23         | 59.08         | 55.21         | 56.4         | 58.93          |
| 1bh5A | 53.1               | 50.98          | 41.67      | 50.33 | 40.2      | 49.84         | 48.37         | 41.34         | 47.39         | 47.71        | 50.65          |
| 1be9A | 58.56              | 58.33          | 46.76      | 59.26 | 47.45     | 57.64         | 54.4          | 57.64         | 46.53         | 53.01        | 57.41          |
| 1bszA | 41.52              | 40             | 39.09      | 42.88 | 40.15     | 39.85         | 40.3          | 40            | 39.39         | 39.24        | 41.36          |

|        |       |       |       |       |       |       |       |       |       |       |       |
|--------|-------|-------|-------|-------|-------|-------|-------|-------|-------|-------|-------|
| 1bvqA  | 59.53 | 61.15 | 56.29 | 60.07 | 58.27 | 60.97 | 61.69 | 57.19 | 50.54 | 56.83 | 57.55 |
| 1c9kB  | 20.56 | 20.83 | 21.39 | 20.56 | 20    | 20.14 | 19.72 | 20.42 | 20.69 | 19.31 | 21.81 |
| 1cfvH  | 63.66 | 61.76 | 62.18 | 63.45 | 61.55 | 61.97 | 61.76 | 57.56 | 56.72 | 65.13 | 64.08 |
| 1ccwA  | 60.04 | 59.85 | 58.76 | 61.86 | 61.5  | 58.58 | 56.93 | 54.56 | 60.04 | 60.77 | 60.22 |
| 1cv8_  | 36.13 | 35.84 | 34.83 | 35.69 | 28.61 | 35.26 | 35.98 | 32.8  | 32.95 | 34.83 | 35.26 |
| 1cpq_  | 66.47 | 65.89 | 63.76 | 65.89 | 51.16 | 66.28 | 65.89 | 62.21 | 52.91 | 67.64 | 64.53 |
| 1d0iA  | 38.83 | 39.67 | 42.5  | 40.17 | 34.83 | 38.5  | 38    | 40    | 33.33 | 37.17 | 38.33 |
| 1d01D  | 56.85 | 55.51 | 52.98 | 56.85 | 43.01 | 55.8  | 51.79 | 51.79 | 51.49 | 56.7  | 55.8  |
| 1d2uA  | 32.61 | 32.07 | 30.98 | 32.2  | 28.53 | 32.2  | 30.84 | 29.35 | 30.84 | 33.02 | 32.07 |
| 1dljC  | 53.28 | 53.83 | 53.83 | 54.56 | 52.01 | 54.01 | 54.38 | 55.11 | 54.2  | 51.09 | 52.55 |
| 1d8uA  | 48.48 | 48.79 | 47.27 | 48.64 | 36.21 | 48.48 | 44.7  | 43.03 | 35.61 | 44.39 | 47.42 |
| 1d7bA  | 10.41 | 9.86  | 9.86  | 10.14 | 9.32  | 9.86  | 9.19  | 10    | 9.86  | 9.86  | 10    |
| 1d8A   | 62.29 | 62.29 | 50.42 | 62.08 | 48.94 | 61.02 | 59.53 | 52.54 | 51.27 | 60.81 | 62.29 |
| 1ddrA  | 63.68 | 63.52 | 51.26 | 64.31 | 48.9  | 62.42 | 62.26 | 58.96 | 44.97 | 61.95 | 64.15 |
| 1dt1A  | 32.75 | 33.14 | 25.58 | 33.91 | 25.58 | 31.59 | 32.36 | 27.52 | 27.33 | 15.7  | 32.75 |
| 1ds7A  | 51.41 | 51.92 | 53.33 | 50.51 | 43.33 | 51.41 | 51.67 | 48.08 | 49.87 | 49.87 | 51.67 |
| 1dveA  | 43.93 | 45.33 | 39.02 | 43.69 | 40.07 | 43.81 | 43.69 | 41.36 | 37.85 | 48.25 | 44.74 |
| 1dud_  | 59.07 | 59.48 | 59.27 | 58.67 | 48.99 | 58.47 | 55.65 | 51.41 | 50.4  | 57.66 | 58.87 |
| 1dxpA  | 25.86 | 27.43 | 21    | 26.86 | 21    | 25.29 | 24.57 | 24    | 23.14 | 23.43 | 27    |
| 1dw0A  | 32.81 | 32.81 | 32.37 | 33.71 | 29.69 | 31.25 | 32.37 | 31.47 | 30.36 | 30.58 | 30.8  |
| 1dzrA  | 45.22 | 46.86 | 45.22 | 46.72 | 49.04 | 46.04 | 45.22 | 46.04 | 45.49 | 46.58 | 46.17 |
| 1e29A  | 42.22 | 38.89 | 35    | 40.74 | 37.41 | 40.37 | 38.52 | 38.7  | 36.11 | 42.59 | 42.41 |
| 1e20A  | 51.76 | 51.49 | 48.51 | 52.3  | 44.59 | 51.22 | 50.41 | 49.46 | 46.89 | 53.11 | 51.89 |
| 1ejbA  | 65.33 | 66.52 | 64.58 | 64.73 | 60.71 | 66.37 | 65.77 | 63.24 | 61.46 | 67.56 | 67.41 |
| 1e6iA  | 72.05 | 75.23 | 72.95 | 72.27 | 68.64 | 73.86 | 75.23 | 71.82 | 63.86 | 71.59 | 72.73 |
| 1elrA  | 60.74 | 62.5  | 65.04 | 64.06 | 62.7  | 60.74 | 63.48 | 67.58 | 63.48 | 58.2  | 61.52 |
| 1elkA  | 58.99 | 60.46 | 58.01 | 59.48 | 57.52 | 59.97 | 59.15 | 55.56 | 61.6  | 58.33 | 59.31 |
| 1elwA  | 68.59 | 72.86 | 72.01 | 72.01 | 82.05 | 71.79 | 74.79 | 83.55 | 83.97 | 70.73 | 69.44 |
| 1eumA  | 75.31 | 73.45 | 68.63 | 74.69 | 65.37 | 72.36 | 68.32 | 69.25 | 66.3  | 71.58 | 74.84 |
| 1eqmA  | 57.28 | 57.75 | 56.96 | 59.97 | 50.47 | 57.12 | 56.8  | 58.7  | 46.2  | 51.74 | 57.91 |
| 1f71A  | 51.27 | 54.45 | 56.99 | 53.18 | 51.06 | 53.18 | 56.78 | 52.33 | 56.78 | 48.94 | 51.91 |
| 1eyhA  | 54.34 | 54.86 | 53.99 | 55.03 | 55.56 | 53.99 | 55.73 | 56.08 | 53.99 | 50.52 | 53.47 |
| 1ew4A  | 59.43 | 61.56 | 63.21 | 59.91 | 64.15 | 60.14 | 60.38 | 66.75 | 67.92 | 66.04 | 59.43 |
| 1ff3A  | 52.62 | 49.29 | 49.17 | 53.1  | 42.62 | 50    | 46.9  | 46.9  | 48.1  | 52.98 | 51.19 |
| 1fdk_  | 25.81 | 25    | 23.58 | 25.81 | 23.78 | 24.19 | 22.97 | 20.53 | 19.11 | 22.15 | 23.58 |
| 1g5tA  | 42.04 | 42.83 | 41.56 | 42.68 | 36.62 | 42.04 | 40.92 | 41.08 | 35.51 | 40.61 | 42.83 |
| 1fim0D | 70.67 | 71.33 | 68.67 | 70    | 66    | 69.67 | 66    | 65    | 64    | 68.33 | 69.67 |
| 1goyA  | 36.57 | 35.42 | 27.55 | 37.73 | 31.02 | 35.19 | 34.49 | 33.1  | 31.25 | 30.09 | 36.57 |
| 1gevb  | 60.85 | 62.5  | 54.04 | 63.42 | 56.8  | 60.66 | 59.93 | 56.43 | 53.49 | 61.58 | 61.95 |
| 1gy7A  | 63.84 | 64.67 | 65.5  | 63.64 | 57.23 | 63.84 | 64.26 | 64.26 | 64.67 | 62.6  | 64.26 |
| 1gxuA  | 58.81 | 60.23 | 59.09 | 61.08 | 51.99 | 60.23 | 62.22 | 52.84 | 54.55 | 58.81 | 59.66 |
| 1gppA  | 45.28 | 45.08 | 43.11 | 45.28 | 47.83 | 44.69 | 43.11 | 40.16 | 45.67 | 45.87 | 45.87 |
| 1h97A  | 54.08 | 54.08 | 51.53 | 54.42 | 47.79 | 52.89 | 52.38 | 54.76 | 54.42 | 53.06 | 54.59 |
| 1h4hA  | 47.82 | 48.06 | 43.57 | 48.54 | 42.48 | 47.09 | 47.45 | 46.48 | 40.66 | 46    | 46.84 |
| 1hbg_  | 59.86 | 62.24 | 55.44 | 59.86 | 60.71 | 60.54 | 60.37 | 54.59 | 52.21 | 60.2  | 59.69 |
| 1h1b_  | 50.16 | 50    | 48.73 | 51.27 | 50.32 | 49.52 | 51.59 | 54.46 | 49.2  | 52.07 | 50.32 |

|       |       |       |       |       |       |       |       |       |       |       |       |
|-------|-------|-------|-------|-------|-------|-------|-------|-------|-------|-------|-------|
| lhdoA | 56.71 | 58.29 | 57.8  | 58.41 | 61.83 | 56.59 | 59.63 | 63.54 | 64.76 | 59.39 | 59.76 |
| lj3wA | 59.51 | 63.43 | 56.72 | 59.7  | 56.34 | 61.01 | 60.82 | 60.26 | 59.14 | 61.57 | 61.57 |
| li4sA | 44.9  | 43.54 | 42.01 | 47.79 | 40.99 | 43.54 | 40.99 | 42.69 | 44.05 | 44.9  | 45.41 |
| lhn_  | 28.65 | 28.27 | 26.92 | 29.23 | 27.31 | 27.69 | 29.62 | 26.92 | 25.58 | 28.85 | 28.08 |
| lkafA | 24.77 | 24.07 | 22.69 | 24.54 | 20.83 | 23.84 | 24.31 | 21.76 | 21.3  | 22.45 | 24.54 |
| lj77A | 43.97 | 45.48 | 42.59 | 43.09 | 41.96 | 44.22 | 44.85 | 43.47 | 43.47 | 43.97 | 45.48 |
| lmn8A | 24.74 | 25.26 | 25    | 25.79 | 27.89 | 25    | 25    | 25    | 25    | 26.32 | 25.53 |
| lmk0A | 44.59 | 45.1  | 42.53 | 45.1  | 38.4  | 44.33 | 41.24 | 40.72 | 40.46 | 43.56 | 44.85 |
| l191A | 59.8  | 62.5  | 54.39 | 61.15 | 65.2  | 58.78 | 55.74 | 55.07 | 59.8  | 58.11 | 57.77 |
| lnlqA | 23.1  | 22.62 | 20.48 | 21.9  | 20.95 | 22.62 | 24.52 | 20.71 | 18.81 | 19.29 | 23.1  |
| loh0A | 62.8  | 64.6  | 64.8  | 64.4  | 62.4  | 63.8  | 65.8  | 64.4  | 63    | 67.2  | 65.6  |
| lo82A | 30.36 | 30.36 | 30    | 31.43 | 21.07 | 29.29 | 28.93 | 27.86 | 30.71 | 31.43 | 29.64 |
| lnwaA | 24.11 | 25.15 | 23.07 | 24.4  | 26.19 | 24.26 | 23.51 | 24.26 | 26.34 | 24.85 | 24.7  |
| lou8A | 41.51 | 42.22 | 46.46 | 41.27 | 36.32 | 41.27 | 45.75 | 46.7  | 44.34 | 44.1  | 42.22 |
| loohA | 48.21 | 48.81 | 50.2  | 49.4  | 52.38 | 48.61 | 50.4  | 51.79 | 48.61 | 49.6  | 48.21 |
| lok0A | 18.24 | 16.22 | 16.22 | 18.24 | 17.23 | 17.23 | 16.22 | 15.54 | 14.86 | 12.16 | 17.57 |
| low4A | 54.79 | 53.96 | 56.46 | 53.54 | 54.17 | 53.54 | 53.75 | 52.71 | 56.46 | 53.13 | 55.21 |
| lq4kA | 7.88  | 8.22  | 8.11  | 8.22  | 7.55  | 8     | 8     | 8.56  | 8.22  | 8.22  | 8.33  |
| lq1fA | 62.5  | 65.2  | 63.68 | 63.85 | 54.9  | 65.37 | 64.02 | 61.49 | 56.42 | 62.33 | 63.18 |
| lrfyA | 61.8  | 62.92 | 59.27 | 61.8  | 49.72 | 62.08 | 62.64 | 60.11 | 56.18 | 59.27 | 61.24 |
| lsz7A | 46.86 | 48.58 | 45.75 | 47.48 | 41.98 | 47.33 | 47.33 | 44.34 | 42.45 | 46.38 | 47.17 |
| lt3yA | 62.21 | 62.79 | 65.08 | 63.93 | 52.86 | 62.6  | 63.93 | 65.65 | 52.29 | 63.55 | 62.79 |
| lt1vA | 61.56 | 62.1  | 52.96 | 59.14 | 50.54 | 60.75 | 57.8  | 50.81 | 49.46 | 60.48 | 59.95 |
| ltkuA | 9.44  | 9.69  | 9.95  | 9.69  | 8.93  | 9.18  | 9.31  | 9.06  | 9.06  | 9.57  | 10.33 |
| lt7dA | 4.81  | 4.69  | 5.17  | 4.93  | 4.69  | 4.57  | 4.69  | 4.93  | 4.69  | 4.81  | 4.81  |
| ltqgA | 72.14 | 72.62 | 74.05 | 73.81 | 64.76 | 72.14 | 70.71 | 71.19 | 71.43 | 76.19 | 72.38 |
| ltp6A | 42.06 | 42.06 | 42.26 | 42.86 | 40.28 | 42.26 | 42.86 | 40.87 | 38.29 | 45.63 | 44.25 |
| ltugB | 41.18 | 39.22 | 36.27 | 41.99 | 37.25 | 39.54 | 38.73 | 38.07 | 35.62 | 40.03 | 41.18 |
| lu2hA | 80.21 | 82.81 | 74.48 | 81.25 | 77.86 | 83.07 | 82.55 | 76.56 | 74.22 | 79.43 | 80.47 |
| ltzvA | 51.77 | 52.66 | 52.13 | 51.06 | 51.95 | 50.53 | 52.48 | 55.14 | 53.01 | 53.55 | 52.84 |
| lufyA | 34.17 | 33.26 | 36.01 | 34.86 | 27.98 | 33.94 | 33.72 | 32.57 | 33.72 | 35.09 | 34.63 |
| lu84A | 33.64 | 33.64 | 33.95 | 35.49 | 32.41 | 33.64 | 35.19 | 33.33 | 33.64 | 34.88 | 34.88 |
| lu55A | 48.46 | 49.02 | 41.9  | 50.42 | 44.13 | 48.04 | 48.32 | 49.86 | 38.83 | 48.04 | 48.46 |
| lugiA | 16.87 | 17.17 | 16.57 | 17.77 | 14.76 | 16.27 | 15.66 | 15.96 | 15.66 | 16.57 | 16.27 |
| lusqA | 32.91 | 32.55 | 31.29 | 32.73 | 28.6  | 32.73 | 33.27 | 31.47 | 32.91 | 33.27 | 33.09 |
| lw53A | 50.3  | 47.32 | 45.54 | 50.3  | 41.07 | 47.32 | 44.35 | 44.05 | 49.7  | 52.08 | 49.4  |
| luxzA | 61.45 | 61.83 | 55.34 | 61.26 | 50.19 | 60.69 | 59.92 | 51.72 | 51.34 | 59.35 | 60.69 |
| luuyA | 64.91 | 67.39 | 67.08 | 66.15 | 62.11 | 67.24 | 69.41 | 67.55 | 63.66 | 66.3  | 66.46 |
| lw1zA | 36.18 | 36.18 | 37.06 | 36.18 | 36.18 | 36.18 | 37.06 | 37.35 | 37.06 | 36.18 | 36.18 |
| lwmhB | 59.45 | 60.67 | 55.79 | 60.37 | 70.12 | 61.28 | 60.98 | 68.9  | 75.3  | 58.84 | 60.98 |
| lwmhA | 72.89 | 75.9  | 71.69 | 72.29 | 57.23 | 72.29 | 70.48 | 60.84 | 64.76 | 69.88 | 72.89 |
| lwzdA | 46.41 | 47.37 | 41.39 | 46.53 | 37.68 | 46.65 | 46.65 | 43.42 | 37.44 | 49.28 | 49.16 |
| lwpaA | 24.77 | 23.6  | 23.36 | 25.47 | 23.36 | 21.96 | 22.66 | 23.6  | 23.6  | 25.23 | 25    |
| lx91A | 72.32 | 72.99 | 71.64 | 70.3  | 70.47 | 71.98 | 69.3  | 66.11 | 62.25 | 69.13 | 71.48 |
| lx6iA | 53.37 | 55.9  | 65.17 | 54.21 | 66.29 | 55.06 | 61.24 | 67.42 | 64.04 | 52.53 | 53.93 |
| lxa8A | 22.96 | 24.23 | 24.11 | 22.83 | 21.56 | 23.09 | 24.23 | 22.07 | 21.43 | 23.72 | 22.83 |



|             |                |                |                |                |                |                |                |                |                |                |                |
|-------------|----------------|----------------|----------------|----------------|----------------|----------------|----------------|----------------|----------------|----------------|----------------|
| 1xmtA       | 55.79          | 57.11          | 56.32          | 56.58          | 50             | 53.42          | 52.89          | 58.16          | 54.74          | 54.47          | 55.79          |
| 1y3dI       | 39.06          | 38.67          | 41.02          | 41.41          | 37.5           | 38.28          | 37.89          | 37.11          | 37.11          | 39.06          | 39.06          |
| 1xppA       | 62.37          | 63.89          | 60.1           | 62.63          | 47.47          | 64.39          | 59.34          | 57.83          | 50.25          | 48.74          | 63.89          |
| 1yd0A       | 44.94          | 46.63          | 41.01          | 46.91          | 41.85          | 45.51          | 46.35          | 44.94          | 43.54          | 39.04          | 43.54          |
| 1y9tA       | 20.23          | 19.55          | 19.09          | 19.77          | 18.18          | 18.86          | 18.41          | 18.18          | 19.32          | 20             | 20.45          |
| 1z3eB       | 66.07          | 68.75          | 66.07          | 65.18          | 68.75          | 65.63          | 69.2           | 63.84          | 71.88          | 70.54          | 66.07          |
| 2bwfA       | 64.61          | 67.21          | 65.26          | 68.83          | 58.12          | 64.94          | 64.61          | 58.12          | 68.18          | 63.64          | 63.96          |
| 2b5aA       | 77.6           | 76.95          | 69.81          | 78.9           | 74.35          | 77.27          | 69.81          | 73.05          | 69.81          | 81.17          | 77.6           |
| 2chhA       | 17.26          | 17.26          | 16.15          | 16.59          | 15.04          | 17.04          | 17.48          | 16.81          | 15.04          | 11.95          | 16.37          |
| 2cb8A       | 76.74          | 78.2           | 77.62          | 77.62          | 78.2           | 76.74          | 77.33          | 77.62          | 79.07          | 76.16          | 77.33          |
| 2c92A       | 63.78          | 67.52          | 68.88          | 63.27          | 63.95          | 65.99          | 66.5           | 69.39          | 64.46          | 63.61          | 63.1           |
| 2ev1A       | 17.97          | 19.19          | 20.27          | 18.92          | 16.89          | 18.11          | 18.65          | 19.46          | 20.54          | 11.89          | 17.97          |
| 2gkgA       | 70.49          | 71.31          | 56.76          | 71.72          | 64.55          | 69.88          | 68.65          | 68.24          | 60.04          | 68.65          | 70.29          |
| 2fcwA       | 46.46          | 46.23          | 45.28          | 46.46          | 42.22          | 46.46          | 44.81          | 43.4           | 43.63          | 48.11          | 47.88          |
| 2h7zA       | 53             | 55.33          | 55.67          | 54.67          | 51.33          | 53.33          | 53.33          | 53.33          | 51             | 49.67          | 54.33          |
| 2grrB       | 21.02          | 21.18          | 22.13          | 21.02          | 20.22          | 21.18          | 21.18          | 22.77          | 19.27          | 20.54          | 22.45          |
| 2hl0A       | 51.05          | 50.7           | 49.48          | 52.27          | 47.73          | 50.17          | 50.35          | 51.75          | 50.7           | 51.4           | 50.17          |
| 2ifrA       | 11.76          | 12.01          | 12.38          | 12.62          | 11.4           | 11.64          | 12.01          | 11.27          | 10.66          | 11.89          | 11.52          |
| 2iu5A       | 28.91          | 28.77          | 28.77          | 28.35          | 30.03          | 29.05          | 28.77          | 29.33          | 29.19          | 26.54          | 27.93          |
| 2ip6A       | 73.28          | 76.72          | 78.74          | 75             | 76.44          | 75             | 80.46          | 84.2           | 76.15          | 77.59          | 74.14          |
| 2j8wA       | 55.47          | 56.05          | 55.47          | 55.86          | 55.08          | 55.08          | 56.05          | 53.91          | 52.34          | 52.73          | 56.45          |
| 2nmlA       | 20.5           | 19.5           | 18.75          | 21             | 21             | 19.75          | 19             | 18.5           | 21.5           | 20             | 21             |
| 2jekA       | 14.11          | 14.29          | 13.04          | 14.29          | 13.04          | 13.93          | 13.93          | 13.75          | 13.57          | 14.11          | 13.93          |
| 2o37A       | 55.56          | 58.64          | 60.19          | 59.88          | 66.98          | 57.72          | 61.42          | 66.67          | 66.05          | 54.32          | 56.48          |
| 2ofcA       | 22.34          | 22.7           | 21.99          | 21.45          | 15.43          | 21.45          | 21.1           | 19.15          | 18.62          | 21.28          | 21.81          |
| 2pmrA       | 72.7           | 71.71          | 72.7           | 74.01          | 62.17          | 69.41          | 65.79          | 67.43          | 67.76          | 65.79          | 72.04          |
| 2p6wA       | 21.24          | 22.09          | 22.09          | 23.3           | 18.93          | 21.48          | 22.33          | 21.72          | 17.48          | 17.96          | 20.27          |
| 2oznA       | 39.85          | 39.1           | 37.03          | 39.66          | 35.71          | 38.53          | 39.29          | 36.09          | 37.03          | 38.91          | 38.72          |
| 2pvbA       | 40.42          | 41.82          | 40.42          | 42.06          | 39.25          | 40.65          | 41.82          | 38.55          | 41.12          | 38.79          | 40.19          |
| 2pv2A       | 68.2           | 68.2           | 78.64          | 70.15          | 74.51          | 68.93          | 67.72          | 74.76          | 72.82          | 69.9           | 68.69          |
| 2rb8A       | 79.57          | 83.06          | 77.42          | 81.72          | 76.08          | 82.53          | 77.15          | 80.11          | 77.69          | 80.65          | 79.57          |
| 2v2pA       | 80             | 77.79          | 67.06          | 78.97          | 66.62          | 77.65          | 74.85          | 69.71          | 69.85          | 76.47          | 80.44          |
| 2rk3A       | 59.63          | 62.43          | 62.03          | 59.76          | 66.58          | 61.36          | 61.5           | 65.64          | 65.51          | 59.89          | 59.22          |
| 2zs0D       | 67.93          | 68.97          | 68.62          | 69.14          | 69.66          | 66.21          | 62.76          | 65.17          | 56.72          | 61.03          | 66.38          |
| 2vyyA       | 47.27          | 46.36          | 48.86          | 49.77          | 47.05          | 45.91          | 48.86          | 50.45          | 52.5           | 51.59          | 48.64          |
| 2v33A       | 19.78          | 21.15          | 23.9           | 21.98          | 22.25          | 21.15          | 21.98          | 23.08          | 22.25          | 23.08          | 21.7           |
| 3bqpA       | 59.69          | 62.19          | 60.62          | 58.75          | 57.19          | 61.25          | 63.75          | 57.81          | 52.5           | 55.94          | 60.62          |
| 3bfoA       | 71.18          | 72.94          | 70.88          | 71.47          | 72.06          | 70.29          | 74.41          | 74.71          | 73.24          | 75             | 71.47          |
| 3by4A       | 39.39          | 40.26          | 40.12          | 40.26          | 36.63          | 39.97          | 41.86          | 39.24          | 38.95          | 39.39          | 39.83          |
| 3bqsA       | 28.24          | 28.24          | 26.47          | 28.82          | 27.06          | 27.65          | 28.24          | 25             | 25.29          | 25.88          | 27.35          |
| 3c7mA       | 45.26          | 45             | 47.82          | 44.87          | 42.18          | 44.74          | 43.33          | 45.38          | 43.33          | 44.74          | 45.9           |
| 3d9nA       | 55.43          | 58.7           | 61.96          | 56.7           | 60.14          | 59.42          | 61.05          | 61.96          | 63.59          | 59.96          | 58.33          |
| 3cjsB       | 57.29          | 59.72          | 71.53          | 56.6           | 53.13          | 57.29          | 62.5           | 63.54          | 68.75          | 60.42          | 58.68          |
| <b>Mean</b> | <b>48.9988</b> | <b>49.6353</b> | <b>47.7585</b> | <b>49.5585</b> | <b>45.5671</b> | <b>48.8585</b> | <b>48.6577</b> | <b>47.7868</b> | <b>46.4517</b> | <b>48.1588</b> | <b>49.1479</b> |

Supplementary Table S3. Refinement performance considering GDT-HA of the best of top five refined structures.

| PDB   | Starting<br>GDT-HA | Refined GDT-HA |            |       |           |               |               |               |               |              |                |
|-------|--------------------|----------------|------------|-------|-----------|---------------|---------------|---------------|---------------|--------------|----------------|
|       |                    | refined-C      | refined-NC | FG-MD | FastRelax | FastRelax-0.5 | FastRelax-1.0 | FastRelax-2.0 | FastRelax-4.0 | ModRefiner-0 | ModRefiner-100 |
| 1a07A | 74.05              | 76.19          | 73.81      | 77.38 | 70.95     | 74.05         | 73.33         | 72.86         | 73.33         | 71.19        | 73.57          |
| 1a00A | 64.18              | 65.78          | 59.93      | 64.18 | 64.54     | 64.01         | 63.12         | 62.94         | 61.17         | 62.77        | 64.36          |
| 101m_ | 66.56              | 71.27          | 65.26      | 69.32 | 52.11     | 69.16         | 67.37         | 66.4          | 60.39         | 68.67        | 67.86          |
| 1a5v_ | 55.82              | 59.42          | 58.05      | 54.62 | 45.55     | 56.51         | 55.99         | 53.6          | 51.37         | 55.48        | 56.51          |
| 1atlA | 64                 | 68.25          | 68.12      | 64.38 | 63        | 66.75         | 65.25         | 67.37         | 65.25         | 63.88        | 64.13          |
| 1afqC | 55.73              | 57.55          | 57.81      | 55.73 | 45.31     | 55.99         | 55.47         | 53.65         | 47.66         | 44.79        | 56.25          |
| 1awqA | 57.32              | 58.54          | 59.3       | 56.86 | 57.32     | 57.62         | 59.6          | 59.3          | 58.23         | 57.77        | 57.47          |
| 1b0b_ | 62.94              | 62.94          | 63.48      | 63.12 | 57.62     | 62.23         | 60.82         | 60.46         | 61.52         | 59.93        | 63.48          |
| 1b11A | 54.2               | 52.88          | 52.43      | 52.88 | 47.12     | 51.99         | 51.33         | 48.45         | 47.12         | 50.22        | 52.88          |
| 1b66A | 57.07              | 58.51          | 56.16      | 57.97 | 57.07     | 56.7          | 57.25         | 55.8          | 55.8          | 56.16        | 57.07          |
| 1b1cA | 66.27              | 68.83          | 67.47      | 64.31 | 63.25     | 66.72         | 66.42         | 67.17         | 64.61         | 66.57        | 66.87          |
| 1bs4A | 59.23              | 60.71          | 59.82      | 59.08 | 57.14     | 60.12         | 59.23         | 59.67         | 59.23         | 56.4         | 58.93          |
| 1bh5A | 53.1               | 52.12          | 45.75      | 50.33 | 48.86     | 50            | 49.84         | 46.57         | 48.86         | 47.71        | 50.65          |
| 1be9A | 58.56              | 58.56          | 57.87      | 59.26 | 52.31     | 57.64         | 58.33         | 58.33         | 59.95         | 53.01        | 57.41          |
| 1bzsA | 41.52              | 40.3           | 41.36      | 42.88 | 41.06     | 40            | 40.91         | 41.21         | 39.39         | 39.24        | 41.36          |
| 1bvqA | 59.53              | 61.87          | 62.05      | 60.07 | 60.97     | 60.97         | 61.69         | 62.59         | 58.81         | 56.83        | 57.55          |
| 1c9kB | 20.56              | 20.83          | 22.08      | 20.56 | 22.78     | 20.28         | 20.83         | 21.94         | 21.39         | 19.31        | 21.81          |
| 1cfvH | 63.66              | 63.03          | 62.18      | 63.45 | 61.55     | 62.39         | 61.76         | 61.55         | 61.55         | 65.13        | 64.08          |
| 1ccwA | 60.04              | 60.22          | 61.31      | 61.86 | 61.5      | 59.31         | 60.4          | 58.39         | 60.04         | 60.77        | 60.22          |
| 1cv8_ | 36.13              | 35.84          | 36.27      | 35.69 | 28.61     | 35.69         | 35.98         | 32.95         | 32.95         | 34.83        | 35.26          |
| 1cpq_ | 66.47              | 67.25          | 64.34      | 65.89 | 55.04     | 66.28         | 67.44         | 62.21         | 61.05         | 67.64        | 64.53          |
| 1d0iA | 38.83              | 39.67          | 42.5       | 40.17 | 41.67     | 38.67         | 40.17         | 41.17         | 37.5          | 37.17        | 38.33          |
| 1d01D | 56.85              | 56.55          | 57.29      | 56.85 | 50.3      | 55.8          | 54.61         | 51.79         | 51.49         | 56.7         | 55.8           |
| 1d2uA | 32.61              | 32.74          | 32.47      | 32.2  | 29.89     | 32.2          | 31.66         | 30.98         | 30.84         | 33.02        | 32.07          |
| 1dljC | 53.28              | 56.2           | 56.39      | 54.56 | 57.3      | 54.01         | 54.38         | 55.66         | 56.39         | 51.09        | 52.55          |
| 1d8uA | 48.48              | 50.15          | 49.55      | 48.64 | 36.21     | 48.64         | 48.48         | 43.33         | 39.85         | 44.39        | 47.42          |
| 1d7bA | 10.41              | 10.68          | 10.14      | 10.14 | 10.81     | 9.86          | 10.27         | 10.41         | 11.22         | 9.86         | 10             |
| 1df8A | 62.29              | 62.29          | 60.17      | 62.08 | 49.15     | 61.02         | 59.75         | 55.93         | 51.27         | 60.81        | 62.29          |
| 1ddrA | 63.68              | 64.47          | 62.74      | 64.31 | 55.19     | 62.58         | 62.42         | 58.96         | 53.46         | 61.95        | 64.15          |
| 1dt1A | 32.75              | 33.14          | 32.56      | 33.91 | 27.52     | 32.17         | 33.72         | 29.84         | 29.65         | 15.7         | 32.75          |
| 1ds7A | 51.41              | 52.44          | 53.33      | 50.51 | 50.64     | 51.54         | 51.79         | 53.85         | 49.87         | 49.87        | 51.67          |
| 1dveA | 43.93              | 45.33          | 44.51      | 43.69 | 42.87     | 43.81         | 44.74         | 43.34         | 43.34         | 48.25        | 44.74          |
| 1dud_ | 59.07              | 61.09          | 59.27      | 58.67 | 54.03     | 59.07         | 56.65         | 54.44         | 53.02         | 57.66        | 58.87          |
| 1dxaA | 25.86              | 27.43          | 24.29      | 26.86 | 22        | 25.29         | 27.14         | 25.29         | 23.29         | 23.43        | 27             |
| 1dw0A | 32.81              | 33.48          | 32.59      | 33.71 | 29.69     | 31.47         | 33.71         | 32.59         | 32.59         | 30.58        | 30.8           |
| 1dzrA | 45.22              | 46.99          | 48.5       | 46.72 | 52.32     | 46.04         | 47.27         | 52.19         | 47.27         | 46.58        | 46.17          |
| 1e29A | 42.22              | 41.67          | 40         | 40.74 | 41.85     | 40.37         | 41.3          | 39.81         | 41.67         | 42.59        | 42.41          |
| 1e20A | 51.76              | 52.84          | 54.05      | 52.3  | 52.57     | 51.89         | 51.35         | 49.46         | 49.73         | 53.11        | 51.89          |
| 1ejbA | 65.33              | 67.86          | 65.92      | 64.73 | 65.92     | 66.37         | 66.67         | 65.18         | 64.88         | 67.56        | 67.41          |
| 1e6iA | 72.05              | 75.23          | 76.59      | 72.27 | 72.95     | 73.86         | 75.45         | 72.05         | 72.27         | 71.59        | 72.73          |
| 1elrA | 60.74              | 62.5           | 65.04      | 64.06 | 64.45     | 60.74         | 63.67         | 75.2          | 63.48         | 58.2         | 61.52          |
| 1elkA | 58.99              | 61.6           | 64.22      | 59.48 | 58.99     | 60.29         | 59.97         | 64.38         | 61.6          | 58.33        | 59.31          |
| 1elwA | 68.59              | 73.5           | 82.69      | 72.01 | 82.05     | 72.01         | 76.28         | 83.55         | 83.97         | 70.73        | 69.44          |
| 1eumA | 75.31              | 74.22          | 71.89      | 74.69 | 70.5      | 72.52         | 70.81         | 71.58         | 70.96         | 71.58        | 74.84          |

|       |       |       |       |       |       |       |       |       |       |       |       |
|-------|-------|-------|-------|-------|-------|-------|-------|-------|-------|-------|-------|
| leqmA | 57.28 | 58.7  | 58.39 | 59.97 | 52.69 | 57.28 | 57.44 | 58.7  | 51.42 | 51.74 | 57.91 |
| l71A  | 51.27 | 54.66 | 56.99 | 53.18 | 56.57 | 53.18 | 56.99 | 56.14 | 56.78 | 48.94 | 51.91 |
| leyhA | 54.34 | 55.56 | 56.25 | 55.03 | 57.29 | 53.99 | 55.73 | 58.16 | 55.9  | 50.52 | 53.47 |
| lew4A | 59.43 | 61.56 | 67.92 | 59.91 | 66.51 | 60.14 | 63.21 | 67.92 | 68.16 | 66.04 | 59.43 |
| lf3A  | 52.62 | 50.6  | 50    | 53.1  | 46.31 | 50    | 48.45 | 46.9  | 48.57 | 52.98 | 51.19 |
| lfdk_ | 25.81 | 25.2  | 25    | 25.81 | 23.78 | 24.39 | 23.98 | 22.56 | 22.97 | 22.15 | 23.58 |
| lg5tA | 42.04 | 42.83 | 41.56 | 42.68 | 40.76 | 42.04 | 42.36 | 43.79 | 41.08 | 40.61 | 42.83 |
| lfm0D | 70.67 | 71.33 | 71.67 | 70    | 67    | 70    | 70.33 | 65.67 | 67.67 | 68.33 | 69.67 |
| lgoyA | 36.57 | 35.42 | 33.56 | 37.73 | 31.02 | 35.19 | 36.11 | 33.1  | 32.18 | 30.09 | 36.57 |
| lgevB | 60.85 | 62.68 | 58.09 | 63.42 | 56.8  | 60.66 | 59.93 | 56.8  | 56.62 | 61.58 | 61.95 |
| lgy7A | 63.84 | 65.08 | 67.15 | 63.64 | 63.64 | 64.26 | 64.88 | 65.7  | 65.08 | 62.6  | 64.26 |
| lgxuA | 58.81 | 60.8  | 62.78 | 61.08 | 57.39 | 60.23 | 62.22 | 60.23 | 59.38 | 58.81 | 59.66 |
| lgpqA | 45.28 | 45.67 | 44.09 | 45.28 | 47.83 | 44.69 | 44.88 | 43.9  | 48.43 | 45.87 | 45.87 |
| lh97A | 54.08 | 55.1  | 54.42 | 54.42 | 56.8  | 53.06 | 54.08 | 58.67 | 54.42 | 53.06 | 54.59 |
| lh4hA | 47.82 | 48.06 | 47.21 | 48.54 | 42.72 | 47.33 | 47.57 | 47.94 | 44.78 | 46    | 46.84 |
| lhbq_ | 59.86 | 62.24 | 61.05 | 59.86 | 60.71 | 60.54 | 60.71 | 56.97 | 54.42 | 60.2  | 59.69 |
| lhlb_ | 50.16 | 50.8  | 51.59 | 51.27 | 50.32 | 49.68 | 52.23 | 54.46 | 52.55 | 52.07 | 50.32 |
| lhdoA | 56.71 | 58.9  | 63.78 | 58.41 | 61.83 | 56.83 | 59.63 | 65.12 | 64.76 | 59.39 | 59.76 |
| lj3wA | 59.51 | 63.62 | 62.13 | 59.7  | 61.57 | 61.01 | 63.06 | 62.13 | 59.14 | 61.57 | 61.57 |
| li4sA | 44.9  | 43.88 | 45.58 | 47.79 | 44.39 | 43.54 | 43.54 | 43.88 | 44.73 | 44.9  | 45.41 |
| lhn_  | 28.65 | 28.65 | 28.85 | 29.23 | 32.31 | 27.69 | 30    | 27.5  | 33.08 | 28.85 | 28.08 |
| lkafA | 24.77 | 24.54 | 24.07 | 24.54 | 26.16 | 24.07 | 25.69 | 24.07 | 22.22 | 22.45 | 24.54 |
| lj77A | 43.97 | 45.98 | 46.48 | 43.09 | 41.96 | 44.72 | 45.48 | 44.1  | 43.47 | 43.97 | 45.48 |
| lmn8A | 24.74 | 26.05 | 26.58 | 25.79 | 30.26 | 25    | 26.05 | 26.32 | 27.37 | 26.32 | 25.53 |
| lmk0A | 44.59 | 45.62 | 43.56 | 45.1  | 38.92 | 44.59 | 43.56 | 44.85 | 40.98 | 43.56 | 44.85 |
| li91A | 59.8  | 63.85 | 61.15 | 61.15 | 65.2  | 58.78 | 58.11 | 55.07 | 59.8  | 58.11 | 57.77 |
| lnlqA | 23.1  | 23.33 | 23.81 | 21.9  | 21.43 | 22.86 | 24.52 | 22.86 | 23.33 | 19.29 | 23.1  |
| loh0A | 62.8  | 67    | 67.6  | 64.4  | 65    | 64.2  | 65.8  | 67    | 63    | 67.2  | 65.6  |
| lo82A | 30.36 | 30.36 | 30    | 31.43 | 32.5  | 29.64 | 30    | 31.43 | 30.71 | 31.43 | 29.64 |
| lnwaA | 24.11 | 25.15 | 25    | 24.4  | 26.19 | 24.4  | 25.89 | 25.45 | 26.34 | 24.85 | 24.7  |
| lou8A | 41.51 | 42.92 | 48.58 | 41.27 | 43.87 | 41.27 | 45.75 | 47.88 | 49.76 | 44.1  | 42.22 |
| loohA | 48.21 | 49.8  | 52.18 | 49.4  | 52.38 | 48.61 | 52.18 | 53.37 | 52.18 | 49.6  | 48.21 |
| lok0A | 18.24 | 17.23 | 17.57 | 18.24 | 17.23 | 17.23 | 17.23 | 17.23 | 16.89 | 12.16 | 17.57 |
| low4A | 54.79 | 55    | 56.46 | 53.54 | 54.17 | 53.96 | 56.67 | 54.58 | 56.46 | 53.13 | 55.21 |
| lq4kA | 7.88  | 8.33  | 8.78  | 8.22  | 9.12  | 8     | 8.45  | 8.56  | 8.56  | 8.22  | 8.33  |
| lq1fA | 62.5  | 65.54 | 65.88 | 63.85 | 61.49 | 65.54 | 64.7  | 66.72 | 59.12 | 62.33 | 63.18 |
| lrfyA | 61.8  | 62.92 | 63.48 | 61.8  | 61.52 | 62.08 | 64.04 | 62.64 | 58.99 | 59.27 | 61.24 |
| lsz7A | 46.86 | 49.21 | 49.06 | 47.48 | 46.7  | 47.64 | 47.8  | 45.44 | 47.96 | 46.38 | 47.17 |
| lt3yA | 62.21 | 63.55 | 65.84 | 63.93 | 62.6  | 62.79 | 64.12 | 65.65 | 64.5  | 63.55 | 62.79 |
| lt1vA | 61.56 | 62.9  | 62.37 | 59.14 | 57.53 | 60.75 | 58.6  | 56.18 | 50.54 | 60.48 | 59.95 |
| ltkuA | 9.44  | 9.69  | 9.95  | 9.69  | 9.69  | 9.18  | 9.31  | 10.2  | 10.46 | 9.57  | 10.33 |
| lt7dA | 4.81  | 5.29  | 5.17  | 4.93  | 5.05  | 4.57  | 4.81  | 5.29  | 5.17  | 4.81  | 4.81  |
| ltqgA | 72.14 | 74.76 | 74.29 | 73.81 | 67.62 | 72.14 | 75    | 71.19 | 75.71 | 76.19 | 72.38 |
| ltp6A | 42.06 | 43.65 | 42.66 | 42.86 | 41.27 | 42.66 | 46.63 | 43.45 | 41.67 | 45.63 | 44.25 |
| ltugB | 41.18 | 40.36 | 39.22 | 41.99 | 39.22 | 40.03 | 40.85 | 39.54 | 40.03 | 40.03 | 41.18 |
| lu2hA | 80.21 | 84.64 | 83.33 | 81.25 | 77.86 | 83.33 | 82.55 | 78.91 | 75.26 | 79.43 | 80.47 |

|       |       |       |       |       |       |       |       |       |       |       |       |
|-------|-------|-------|-------|-------|-------|-------|-------|-------|-------|-------|-------|
| 1tzvA | 51.77 | 52.66 | 53.9  | 51.06 | 60.82 | 50.71 | 52.48 | 55.67 | 60.11 | 53.55 | 52.84 |
| 1ufyA | 34.17 | 34.63 | 36.01 | 34.86 | 33.49 | 33.94 | 33.72 | 33.94 | 34.17 | 35.09 | 34.63 |
| 1u84A | 33.64 | 34.26 | 36.11 | 35.49 | 33.33 | 33.64 | 35.8  | 35.8  | 35.19 | 34.88 | 34.88 |
| 1u55A | 48.46 | 49.02 | 50.14 | 50.42 | 57.68 | 48.18 | 48.74 | 49.86 | 47.77 | 48.04 | 48.46 |
| 1ugiA | 16.87 | 17.17 | 16.57 | 17.77 | 16.57 | 16.57 | 15.66 | 15.96 | 17.47 | 16.57 | 16.27 |
| 1usqA | 32.91 | 33.45 | 32.73 | 32.73 | 30.94 | 32.73 | 34.71 | 32.91 | 32.91 | 33.27 | 33.09 |
| 1w53A | 50.3  | 48.81 | 47.92 | 50.3  | 47.92 | 47.32 | 46.43 | 46.43 | 49.7  | 52.08 | 49.4  |
| 1uxzA | 61.45 | 62.6  | 59.35 | 61.26 | 50.57 | 60.88 | 60.11 | 56.49 | 51.34 | 59.35 | 60.69 |
| 1uuyA | 64.91 | 68.79 | 68.32 | 66.15 | 67.7  | 67.55 | 69.41 | 69.88 | 68.94 | 66.3  | 66.46 |
| 1wlzA | 36.18 | 37.06 | 37.65 | 36.18 | 37.06 | 36.18 | 37.35 | 37.94 | 37.35 | 36.18 | 36.18 |
| 1wmhB | 59.45 | 62.8  | 65.85 | 60.37 | 70.12 | 61.28 | 61.59 | 68.9  | 75.3  | 58.84 | 60.98 |
| 1wmhA | 72.89 | 76.2  | 76.2  | 72.29 | 66.27 | 72.89 | 71.99 | 70.48 | 68.67 | 69.88 | 72.89 |
| 1wzdA | 46.41 | 47.85 | 43.78 | 46.53 | 41.75 | 46.77 | 47.97 | 44.86 | 44.14 | 49.28 | 49.16 |
| 1wpaA | 24.77 | 23.6  | 23.83 | 25.47 | 24.53 | 22.43 | 23.13 | 24.07 | 24.77 | 25.23 | 25    |
| 1x91A | 72.32 | 72.99 | 73.15 | 70.3  | 71.31 | 71.98 | 71.48 | 70.13 | 66.11 | 69.13 | 71.48 |
| 1x6iA | 53.37 | 56.18 | 69.38 | 54.21 | 67.42 | 56.18 | 62.36 | 67.42 | 67.7  | 52.53 | 53.93 |
| 1xa8A | 22.96 | 24.23 | 24.49 | 22.83 | 24.11 | 23.09 | 24.49 | 24.11 | 22.32 | 23.72 | 22.83 |
| 1xmtA | 55.79 | 57.11 | 57.89 | 56.58 | 56.05 | 54.47 | 55.79 | 58.16 | 54.74 | 54.47 | 55.79 |
| 1y3dI | 39.06 | 39.06 | 41.02 | 41.41 | 41.02 | 39.06 | 38.28 | 39.84 | 38.67 | 39.06 | 39.06 |
| 1xppA | 62.37 | 64.9  | 60.1  | 62.63 | 50.25 | 64.39 | 62.37 | 58.08 | 53.28 | 48.74 | 63.89 |
| 1yd0A | 44.94 | 47.47 | 45.51 | 46.91 | 46.91 | 46.07 | 48.31 | 44.94 | 46.07 | 39.04 | 43.54 |
| 1y9tA | 20.23 | 19.77 | 19.09 | 19.77 | 18.18 | 18.86 | 19.09 | 19.32 | 19.32 | 20    | 20.45 |
| 1z3eB | 66.07 | 69.2  | 67.86 | 65.18 | 70.54 | 66.07 | 70.54 | 72.77 | 71.88 | 70.54 | 66.07 |
| 2bwfA | 64.61 | 67.21 | 65.26 | 68.83 | 70.45 | 64.94 | 65.91 | 65.26 | 70.78 | 63.64 | 63.96 |
| 2b5aA | 77.6  | 78.25 | 71.43 | 78.9  | 74.35 | 77.6  | 74.03 | 74.68 | 73.05 | 81.17 | 77.6  |
| 2chhA | 17.26 | 17.7  | 17.26 | 16.59 | 16.37 | 17.04 | 18.36 | 18.36 | 15.93 | 11.95 | 16.37 |
| 2cb8A | 76.74 | 78.78 | 79.94 | 77.62 | 78.78 | 77.33 | 82.27 | 79.94 | 79.65 | 76.16 | 77.33 |
| 2c92A | 63.78 | 67.52 | 69.22 | 63.27 | 70.75 | 66.5  | 68.2  | 69.39 | 66.67 | 63.61 | 63.1  |
| 2ev1A | 17.97 | 20.27 | 20.27 | 18.92 | 21.49 | 18.24 | 19.46 | 19.46 | 22.16 | 11.89 | 17.97 |
| 2gkgA | 70.49 | 71.52 | 69.26 | 71.72 | 64.75 | 70.08 | 68.65 | 68.24 | 68.65 | 68.65 | 70.29 |
| 2fewA | 46.46 | 48.11 | 46.93 | 46.46 | 44.58 | 46.93 | 46.46 | 45.99 | 47.41 | 48.11 | 47.88 |
| 2h7zA | 53    | 56.67 | 55.67 | 54.67 | 51.33 | 54    | 54    | 54.67 | 51.33 | 49.67 | 54.33 |
| 2grrB | 21.02 | 21.82 | 22.13 | 21.02 | 20.22 | 21.18 | 22.45 | 22.77 | 22.77 | 20.54 | 22.45 |
| 2hl0A | 51.05 | 51.4  | 51.22 | 52.27 | 55.59 | 50.17 | 51.57 | 51.75 | 51.75 | 51.4  | 50.17 |
| 2ifrA | 11.76 | 12.5  | 12.62 | 12.62 | 11.89 | 11.76 | 12.99 | 12.99 | 11.52 | 11.89 | 11.52 |
| 2iu5A | 28.91 | 29.33 | 32.82 | 28.35 | 36.31 | 29.19 | 29.47 | 30.31 | 31.15 | 26.54 | 27.93 |
| 2ip6A | 73.28 | 77.3  | 78.74 | 75    | 76.44 | 75.57 | 80.46 | 84.2  | 81.32 | 77.59 | 74.14 |
| 2j8wA | 55.47 | 56.05 | 59.57 | 55.86 | 55.08 | 55.66 | 59.38 | 58.2  | 62.89 | 52.73 | 56.45 |
| 2nmlA | 20.5  | 20.5  | 20.5  | 21    | 22    | 19.75 | 21    | 20.5  | 21.5  | 20    | 21    |
| 2jekA | 14.11 | 14.64 | 14.46 | 14.29 | 14.46 | 14.11 | 13.93 | 14.11 | 14.64 | 14.11 | 13.93 |
| 2o37A | 55.56 | 58.64 | 65.74 | 59.88 | 67.9  | 57.72 | 61.42 | 67.28 | 67.9  | 54.32 | 56.48 |
| 2ofcA | 22.34 | 22.7  | 22.7  | 21.45 | 19.68 | 21.63 | 22.34 | 20.04 | 20.04 | 21.28 | 21.81 |
| 2pmrA | 72.7  | 72.37 | 72.7  | 74.01 | 70.72 | 69.41 | 68.75 | 71.38 | 71.38 | 65.79 | 72.04 |
| 2p6wA | 21.24 | 22.21 | 22.21 | 23.3  | 22.94 | 21.48 | 22.69 | 22.33 | 19.9  | 17.96 | 20.27 |
| 2oznA | 39.85 | 40.04 | 40.04 | 39.66 | 40.79 | 38.91 | 39.29 | 37.97 | 38.72 | 38.91 | 38.72 |
| 2pvbA | 40.42 | 41.82 | 41.59 | 42.06 | 39.49 | 40.89 | 41.82 | 42.29 | 41.12 | 38.79 | 40.19 |

|             |                |                |                |                |                |                |                |                |                |                |                |
|-------------|----------------|----------------|----------------|----------------|----------------|----------------|----------------|----------------|----------------|----------------|----------------|
| 2pv2A       | 68.2           | 73.06          | 78.64          | 70.15          | 82.28          | 69.17          | 71.36          | 76.7           | 73.79          | 69.9           | 68.69          |
| 2rb8A       | 79.57          | 83.33          | 83.6           | 81.72          | 77.42          | 82.53          | 79.84          | 80.11          | 77.69          | 80.65          | 79.57          |
| 2v2pA       | 80             | 80.15          | 78.68          | 78.97          | 66.62          | 77.65          | 74.85          | 70.59          | 69.85          | 76.47          | 80.44          |
| 2rk3A       | 59.63          | 62.57          | 64.57          | 59.76          | 66.58          | 61.76          | 63.1           | 65.64          | 65.64          | 59.89          | 59.22          |
| 2zs0D       | 67.93          | 68.97          | 68.79          | 69.14          | 69.66          | 66.55          | 66.21          | 66.72          | 66.21          | 61.03          | 66.38          |
| 2vyyA       | 47.27          | 47.05          | 48.86          | 49.77          | 50             | 46.14          | 48.86          | 54.32          | 52.5           | 51.59          | 48.64          |
| 2v33A       | 19.78          | 21.98          | 25             | 21.98          | 25             | 21.15          | 24.45          | 23.08          | 25.55          | 23.08          | 21.7           |
| 3bqpA       | 59.69          | 62.81          | 61.87          | 58.75          | 61.56          | 61.25          | 65.94          | 62.19          | 55.94          | 55.94          | 60.62          |
| 3bfoA       | 71.18          | 72.94          | 72.65          | 71.47          | 81.47          | 70.88          | 75.29          | 74.71          | 74.12          | 75             | 71.47          |
| 3by4A       | 39.39          | 41.28          | 41.57          | 40.26          | 40.26          | 40.26          | 43.02          | 42.59          | 44.04          | 39.39          | 39.83          |
| 3bqsA       | 28.24          | 28.24          | 27.94          | 28.82          | 27.65          | 27.65          | 28.24          | 27.35          | 27.35          | 25.88          | 27.35          |
| 3c7mA       | 45.26          | 45.26          | 49.36          | 44.87          | 45.9           | 44.87          | 44.49          | 45.38          | 47.31          | 44.74          | 45.9           |
| 3d9nA       | 55.43          | 59.96          | 61.96          | 56.7           | 62.5           | 59.42          | 61.05          | 63.22          | 66.85          | 59.96          | 58.33          |
| 3cjsB       | 57.29          | 59.72          | 73.96          | 56.6           | 66.32          | 59.03          | 62.85          | 71.88          | 72.22          | 60.42          | 58.68          |
| <b>Mean</b> | <b>48.9988</b> | <b>50.3097</b> | <b>50.5284</b> | <b>49.5585</b> | <b>48.7989</b> | <b>49.0536</b> | <b>49.8799</b> | <b>49.8211</b> | <b>49.0739</b> | <b>48.1588</b> | <b>49.1479</b> |

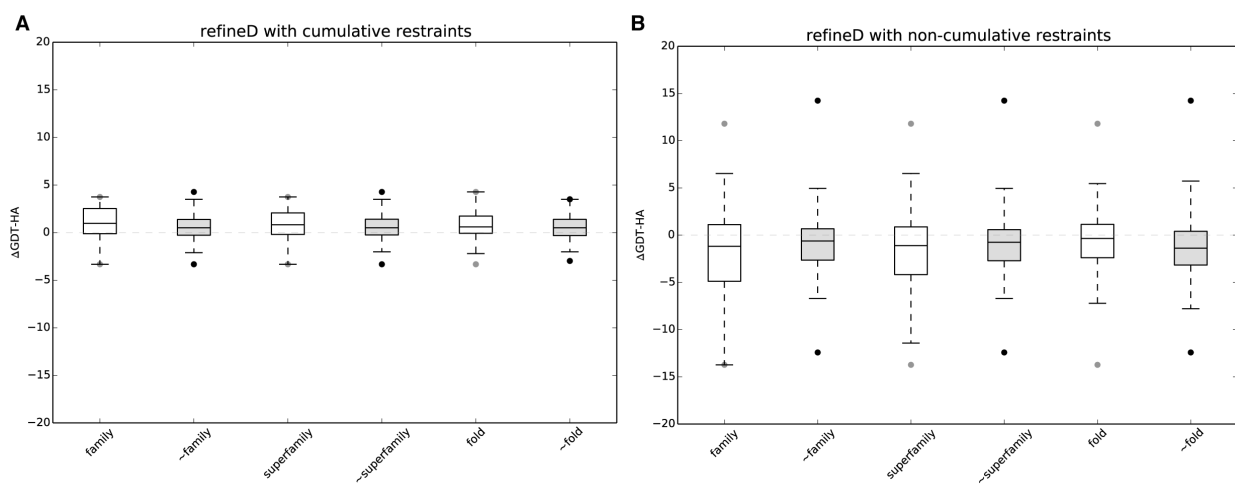

Supplementary Figure S1.  $\Delta$ GDT-HA of refinedD with cumulative and non-cumulative restraints with SCOP family, superfamily, fold class similarity for any of the training proteins. A<sup>-</sup> indicates that none of the test cases belong to the corresponding SCOP classification.
